# Supplementary material for: Comparison of the Areas Under the Curve of Vancomycin Continuous vs. Intermittent Infusion in Critically Ill Pediatrics: A Randomized Clinical Trial
Source: PubMed Central journal article supplement (PMC11302439; doi:10.5812/ijpr-145933), 2024-04-28
Supplement: ijpr-23-1-145933-s001.pdf [file ijpr-23-1-145933-s001.pdf]

**Appendix 1.** Changes in the mean of Pediatric Sequential Organ Failure Assessment (PSOFA score), mean serum creatinine and mean of body temperature among critically ill pediatrics between two methods of vancomycin infusion based on the GEE method

| Factors                   | Groups | Day 1        | Day 2        | Day 3        | Day 4        | Day 5        | Last day of intervention | after intervention cessation | P_value time effect | P_value time × groups | Comparison of time groups <sup>1</sup> |
|---------------------------|--------|--------------|--------------|--------------|--------------|--------------|--------------------------|------------------------------|---------------------|-----------------------|----------------------------------------|
| PSOFA                     | CIV    | 8.30 ± 4.03  | 8.00 ± 3.90  | 7.06 ± 3.86  | 6.54 ± 3.83  | 6.60 ± 4.28  | -                        | -                            | 0.017*              | <0.001*               | T1/T2*<br>T1/T3*<br>T1/T4*<br>T1/T5*   |
|                           | IIV    | 6.62 ± 4.17  | 5.74 ± 3.77  | 4.88 ± 4.04  | 4.71 ± 4.06  | 4.76 ± 4.02  | -                        | -                            | 0.001*              |                       | T1/T3*<br>T1/T4*<br>T1/T5*             |
|                           | Total  | 7.44 ± 4.16  | 6.83 ± 3.97  | 5.94 ± 4.07  | 5.57 ± 4.03  | 5.59 ± 4.21  | -                        | -                            | <0.001*             | -                     | T1/T2*<br>T1/T3*<br>T1/T4*<br>T1/T5*   |
| Serum creatinine (µmol/L) | CIV    | 0.52 ± 0.15  | 0.55± 0.15   | 0.53± 0.14   | 0.50± 0.17   | 0.49± 0.12   | 0.55± 0.17               | 0.51± 0.15                   | 0.093               | <0.001*               | Non-significant                        |
|                           | IIV    | 0.54 ± 0.08  | 0.60± 0.65   | 0.47±0.08    | 0.49± 0.08   | 0.46±0.12    | 0.52 ± 0.18              | 0.55± 0.26                   | <0.001              |                       | T1/T3*<br>T1/T4*<br>T1/T5*             |
|                           | Total  | 0.53 ± 0.12  | 0.57± 0.45   | 0.50± 0.12   | 0.49 ± 0.14  | 0.47 ± 0.12  | 0.53 ± 0.18              | 0.53± 0.21                   | 0.005*              | -                     | T1/T3*<br>T1/T4*<br>T1/T5*             |
| Temperature (°C)          | CIV    | 37.53 ± 0.75 | 37.59 ± 0.94 | 37.40 ± 0.72 | 37.45 ± 0.65 | 37.38 ± 0.57 | -                        | -                            | 0.235               | 0.225                 | Non-significant                        |
|                           | IIV    | 37.60 ± 0.77 | 37.63 ± 0.73 | 37.43 ± 0.59 | 37.41 ± 0.49 | 37.46 ± 0.58 | -                        | -                            | 0.208               |                       | Non-significant                        |
|                           | Total  | 37.57 ± 0.76 | 37.61 ± 0.84 | 37.42 ± 0.65 | 37.43 ± 0.57 | 37.42 ± 0.58 | -                        | -                            | 0.040*              | -                     | Non-significant                        |

Values described as mean ± standard deviation,

\* Statistically significant, P\_value < 0.05 based on the linear Generalized Estimation Equation (GEE) method

<sup>1</sup> each visit time compared with visit time 1

*CIV* Continuous Infusions of Vancomycin, *IIV* Intermittent Infusions of Vancomycin

**Appendix 2.** Results of the linear generalized estimating equation about the effect of intervention on mean changes of serum creatinine level, PSOFA and body temperature during the study

| Factors                                | Groups | Model 1<br>Crude $\beta^1$ , 95% CI | P_value | Model 2<br>Adjusted $\beta$ , 95% CI | P_value |
|----------------------------------------|--------|-------------------------------------|---------|--------------------------------------|---------|
| Serum creatinine ( $\mu\text{mol/L}$ ) | CIV    | Reference                           | -       | Reference                            | -       |
|                                        | IIV    | -0.002 (-0.05, 0.05)                | 0.933   | 0.01 (-0.04, 0.07)                   | 0.603   |
| PSOFA                                  | CIV    | Reference                           | -       | Reference                            | -       |
|                                        | IIV    | -1.84 (-3.56, -0.13)                | 0.035*  | -0.58 (-1.77, 0.59)                  | 0.534   |
| Temperature ( $^{\circ}\text{C}$ )     | CIV    | Reference                           | -       | Reference                            | -       |
|                                        | IIV    | 0.02 (-0.22, 0.28)                  | 0.831   | 0.09 (-0.20, 0.37)                   | 0.539   |

\* Statistically significant, P\_value < 0.05

<sup>1</sup>Coefficient ( $\beta$ )

Model 1: Intercept groups

Model 2: Intercept gender, age, groups, inotrope drugs, total number of prescription drugs during hospitalization, PRISM score and length of hospital stay

CIV Continuous Infusions of Vancomycin, IIV Intermittent Infusions of Vancomycin, PSOFA Pediatric Sequential Organ Failure

Assessment, CI Confidence Interval

**Appendix 3.** Initial model building to describe the population pharmacokinetic parameters of clearance (Cl) and volume of distribution (V), one compartmental structural model was the best model

| Structural model                                                                                                                                                                                                                                                      | one compartment infusion | one compartment infusion | two compartment infusion |
|-----------------------------------------------------------------------------------------------------------------------------------------------------------------------------------------------------------------------------------------------------------------------|--------------------------|--------------------------|--------------------------|
| Individual model                                                                                                                                                                                                                                                      | V, Cl                    | V, Cl                    | Cl, V1, Q, V2            |
| Used covariates                                                                                                                                                                                                                                                       | administration method    | -                        | -                        |
| -2*LL (Lin)                                                                                                                                                                                                                                                           | 873.34                   | 895.94                   | 916.64                   |
| BICc (Lin)                                                                                                                                                                                                                                                            | 900.49                   | 923.76                   | 962.55                   |
| <i>CIV</i> Continuous Infusions of Vancomycin, <i>IIV</i> Intermittent Infusions of Vancomycin, -2*LL (Lin) -2*log-likelihood computed by linearization, BICc (Lin) corrected the Bayesian Information Criteria based on the log-likelihood computed by linearization |                          |                          |                          |

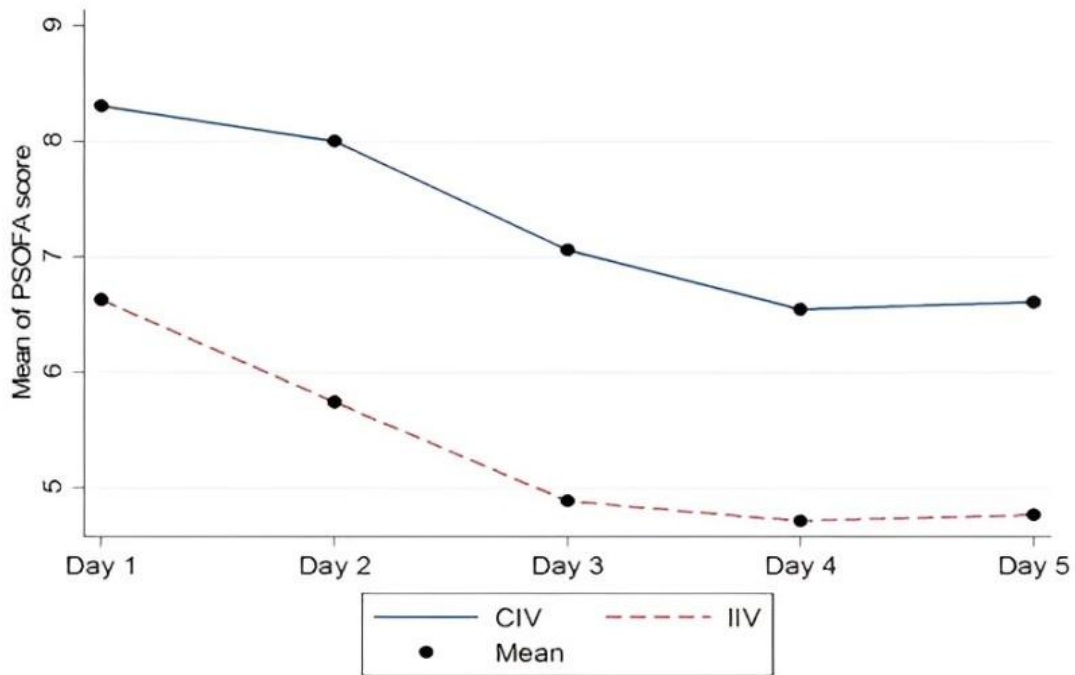

**Appendix 4.** Changes in the mean of Pediatric Sequential Organ Failure Assessment (PSOFA score) of critically ill pediatrics between two methods of vancomycin infusion during study time. *CIV* Continuous Infusions of Vancomycin, *IIV* Intermittent Infusions of Vancomycin

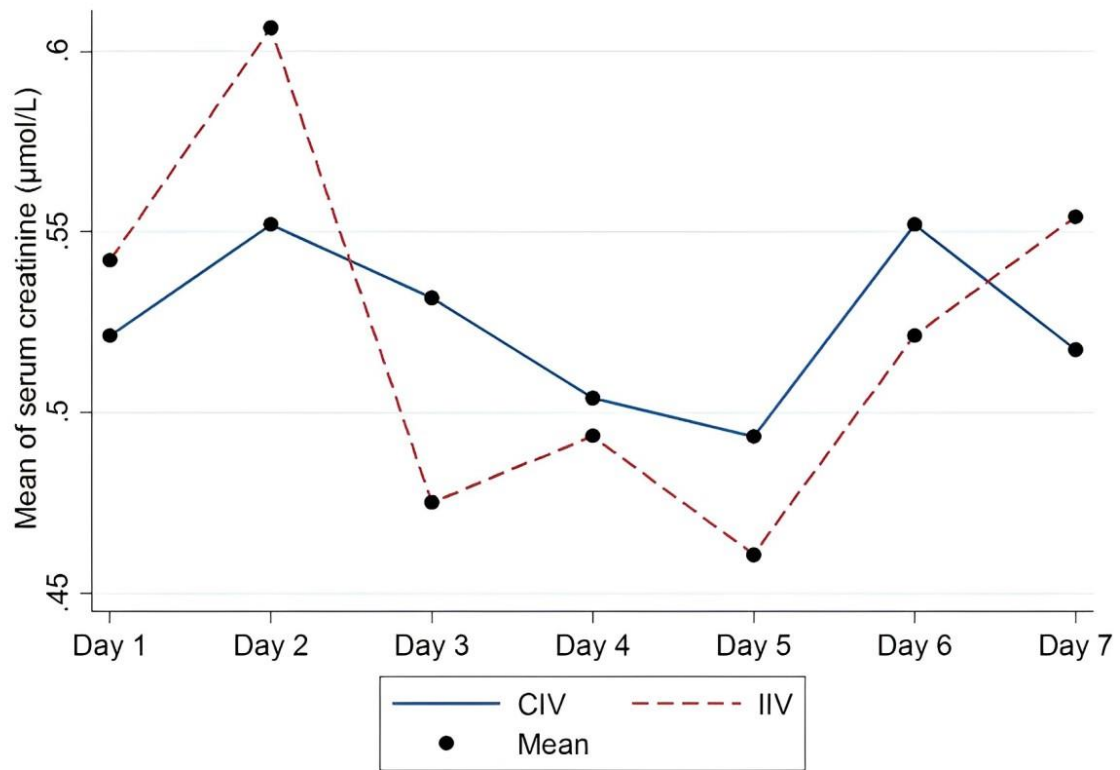

**Appendix 5.** Changes in mean of serum creatinine of critically ill pediatrics between two methods of vancomycin infusion during study time. *CIV* Continuous Infusions of Vancomycin, *IIV* Intermittent Infusions of Vancomycin

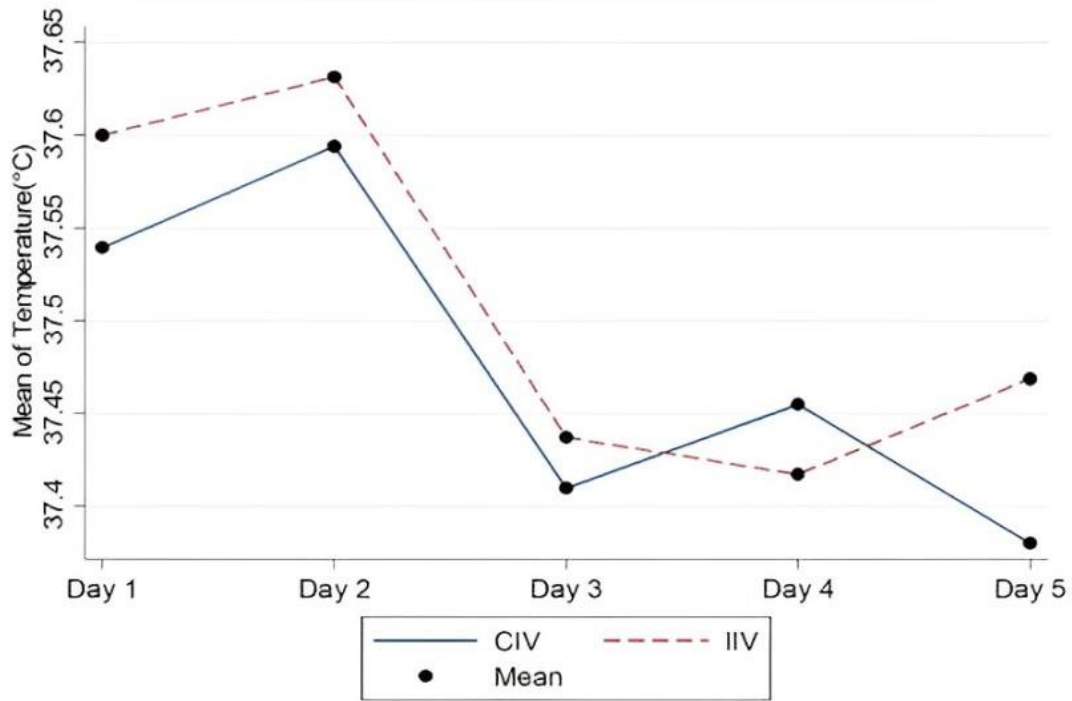

**Appendix 6.** Changes in mean body temperature of critically ill pediatrics between two methods of vancomycin infusion during study time. *CIV* Continuous Infusions of Vancomycin, *IIV* Intermittent Infusions of Vancomycin

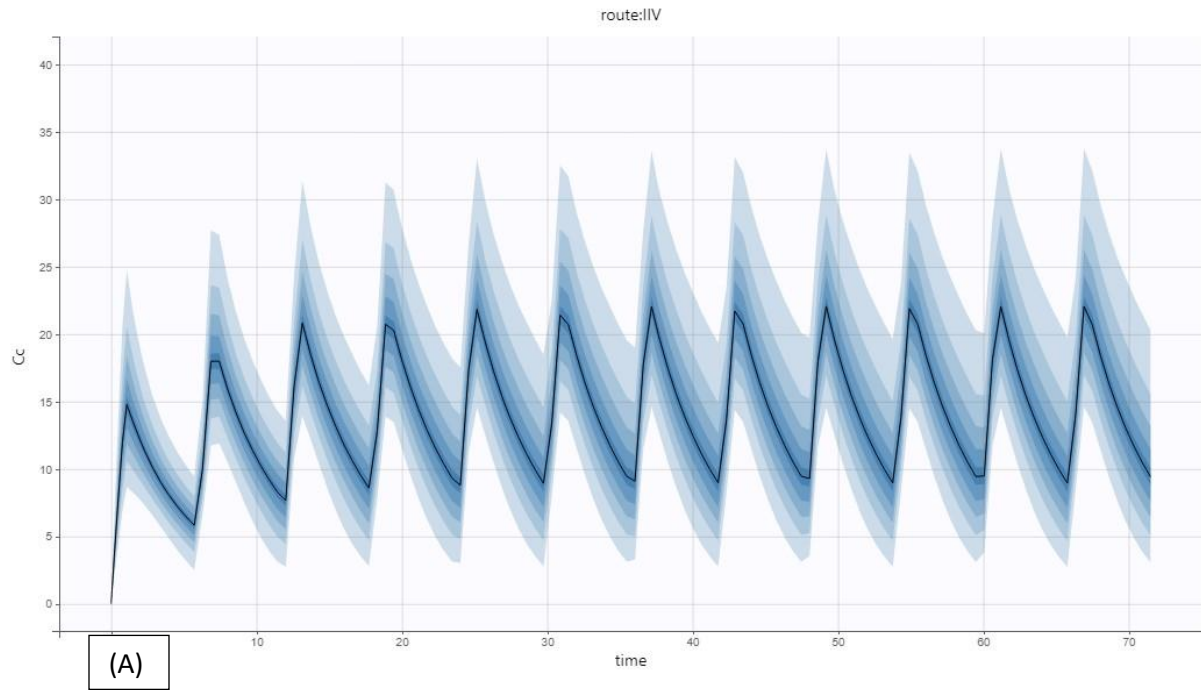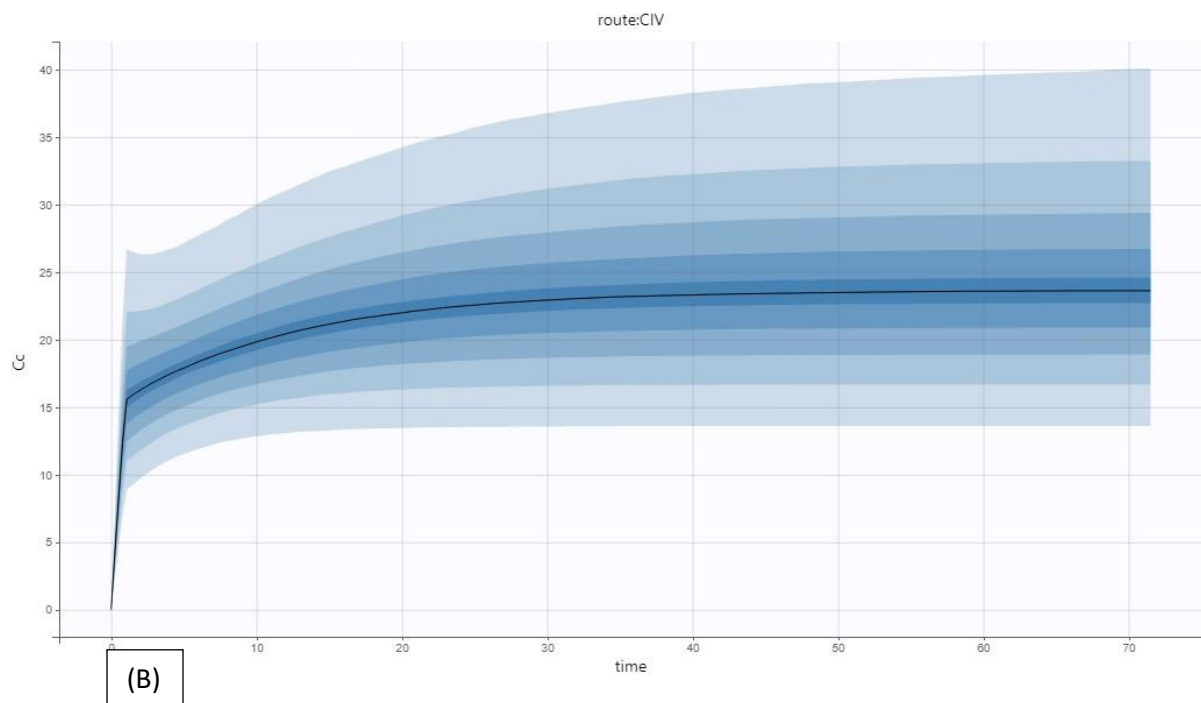

**Appendix 7.** Predicted-corrected visual predictive check for vancomycin concentration versus time A) intermittent infusion of vancomycin method (IIV) B) continuous infusion of vancomycin method (CIV)
